# Supplementary material for: Inter- and intrastrand DNA crosslinks by 2-fluoro-substituted pyrrolobenzodiazepine dimers: stability, stereochemistry and drug orientation
Source: Royal Society of Chemistry journal article supplement (doi:10.1039/c2ob25654a), 2012-01-01
Supplement: c2ob25654a.pdf [file c2ob25654a.pdf]

*Supporting Information for*

Inter- and Intrastrand DNA Crosslinks by 2-Fluoro-  
Substituted Pyrrolobenzodiazepine Dimers: Stability,  
Stereochemistry and Drug Orientation

Jenny Seifert,<sup>a</sup> Soheil Pezeshki,<sup>a</sup> Ahmed Kamal,<sup>b</sup> and Klaus Weisz<sup>\*a</sup>

<sup>a</sup> *Institute of Biochemistry, Ernst-Moritz-Arndt University Greifswald, Felix-Hausdorff-Str. 4,  
D-17487 Greifswald, Germany*

<sup>b</sup> *Chemical Biology Laboratory, Division of Organic Chemistry, Indian Institute of Chemical  
Technology, Hyderabad 500607, India*

**Table of Contents**

|                                                                            |   |
|----------------------------------------------------------------------------|---|
| Figure S1: Molecular model of the <b>S4-1</b> bis-adduct                   | 2 |
| Table S1: Proton chemical shifts and scalar coupling constants of <b>1</b> | 3 |
| Table S2: Proton chemical shifts of d(AAGAATTGTT)·d(AACAATTCTT)            | 4 |
| Figure S2: Portion of a 2D NOE spectrum of the <b>A4-1</b> adduct          | 5 |
| Figure S3: Portion of a 2D NOE spectrum of the <b>S4-1</b> adduct          | 6 |
| Table S3: Proton chemical shifts of the <b>S4-1</b> complex                | 7 |
| Table S4: Proton chemical shifts of the <b>A4-1</b> complex                | 8 |

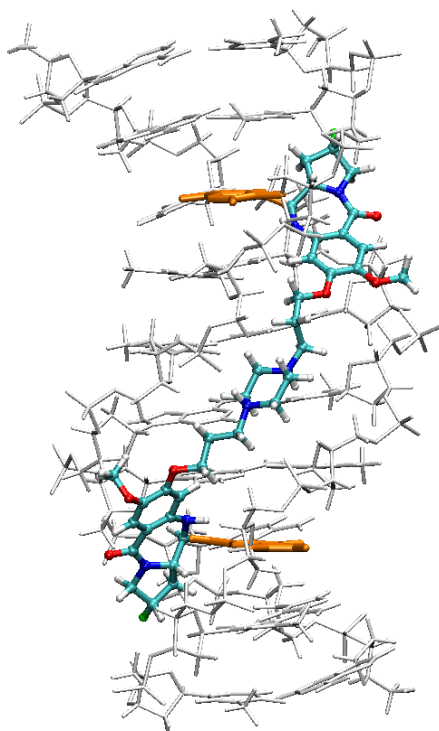

**Fig. S1** Energy-minimized molecular model of an interstrand bis-adduct formed between **1** (11*S*,11*aS*;11'*S*,11*a'S*) and d(AACAATTGTT)<sub>2</sub>. Simple energy minimization of the complex *in vacuo* was performed with fixed Watson-Crick hydrogen bonds using Spartan'08 (Wavefunction Inc., Irvine, CA, USA). Modified guanine bases are colored orange and **1** is shown in atom colors.

**Table S1** Proton chemical shifts  $\delta$  and coupling constants  $J$  (Hz) of the PBD moiety of **1** at 293 K<sup>a</sup>

|                | H1a                    | H1b                    | H2a                    | H3a                    | H3b                    | H11                   | H11a                  |
|----------------|------------------------|------------------------|------------------------|------------------------|------------------------|-----------------------|-----------------------|
| $\delta$ (ppm) | 2.48                   | 2.70                   | 5.39                   | 3.68                   | 4.20                   | 7.83                  | 3.87                  |
| $J$ (F,H)      | <sup>3</sup> $J$ =42.7 | <sup>3</sup> $J$ =17.5 | <sup>2</sup> $J$ =51.7 | <sup>3</sup> $J$ =37.0 | <sup>3</sup> $J$ =22.0 |                       |                       |
| $J$ (H,H1a)    |                        | <sup>2</sup> $J$ =14.9 | <sup>3</sup> $J$ =3.5  |                        |                        |                       | <sup>3</sup> $J$ =9.2 |
| $J$ (H,H1b)    | <sup>2</sup> $J$ =14.9 |                        |                        |                        | <sup>4</sup> $J$ =2.2  | <sup>4</sup> $J$ =2.2 |                       |
| $J$ (H,H2a)    | <sup>3</sup> $J$ =3.5  |                        |                        | <sup>3</sup> $J$ =3.3  |                        |                       |                       |
| $J$ (H,H3a)    |                        |                        | <sup>3</sup> $J$ =3.3  |                        | <sup>2</sup> $J$ =14.2 |                       |                       |
| $J$ (H,H3b)    |                        | <sup>4</sup> $J$ =2.2  |                        | <sup>2</sup> $J$ =14.2 |                        |                       |                       |
| $J$ (H,H11)    |                        | <sup>4</sup> $J$ =2.2  |                        |                        |                        |                       | <sup>3</sup> $J$ =4.3 |
| $J$ (H,H11a)   | <sup>3</sup> $J$ =9.2  |                        |                        |                        |                        | <sup>3</sup> $J$ =4.3 |                       |
|                | H6                     | H9                     | H12                    |                        |                        |                       |                       |
| $\delta$ (ppm) | 7.47                   | 6.83                   | 3.91                   |                        |                        |                       |                       |

<sup>a</sup> in CDCl<sub>3</sub>; uncertainty  $\pm 0.005$  ppm and  $\pm 0.2$  Hz

**Table S2** Proton chemical shifts  $\delta$ (ppm) of d(AAGAATTGTT)·d(AACAATTCTT) (**A4**) at 283 K<sup>a</sup>

| proton                           | residue |      |       |       |       |       |       |       |       |      |
|----------------------------------|---------|------|-------|-------|-------|-------|-------|-------|-------|------|
|                                  | A1      | A2   | G3    | A4    | A5    | T6    | T7    | G8    | T9    | T10  |
| H1'                              | 5.85    | 5.75 | 5.48  | 6.08  | 6.22  | 5.98  | 5.98  | 5.98  | 6.19  | 6.34 |
| H2'                              | 2.39    | 2.57 | 2.57  | 2.72  | 2.62  | 2.06  | 2.24  | 2.70  | 2.26  | 2.34 |
| H2''                             | 2.58    | 2.72 | 2.72  | 3.00  | 3.00  | 2.63  | 2.58  | 2.81  | 2.59  | 2.34 |
| H3'                              | 4.86    | 5.02 | 5.01  | 5.10  | 5.08  | 4.93  | 4.95  | 5.04  | 4.93  | 4.65 |
| H2/H5                            |         |      |       | 7.20  | 7.66  |       |       |       |       |      |
| H6/H8                            | 8.02    | 8.16 | 7.75  | 8.13  | 8.18  | 7.19  | 7.35  | 7.95  | 7.40  | 7.55 |
| CH <sub>3</sub>                  |         |      |       |       |       | 1.28  | 1.61  |       | 1.49  | 1.72 |
| NH                               |         |      | 12.44 |       |       | 13.78 | 13.77 | 12.43 | 13.98 |      |
| NH <sub>2</sub> (1) <sup>b</sup> |         |      |       | 7.32- | 7.07- |       |       |       |       |      |
| NH <sub>2</sub> (2) <sup>b</sup> |         |      |       | 7.50  | 7.21  |       |       |       |       |      |
| proton                           | A11     | A12  | C13   | A14   | A15   | T16   | T17   | C18   | T19   | T20  |
| H1'                              | 5.91    | 6.14 |       |       | 6.24  | 5.96  | 6.18  | 6.11  |       |      |
| H2'                              | 2.51    | 2.73 | 1.96  | 2.77  | 2.64  | 2.06  | 2.28  | 2.19  |       |      |
| H2''                             | 2.69    | 2.85 | 2.32  | 2.99  | 2.99  | 2.63  | 2.63  | 2.63  |       |      |
| H3'                              | 4.90    | 5.05 | 4.80  | 5.07  | 5.07  | 4.90  | 4.95  | 4.95  |       |      |
| H2/H5                            |         | 7.87 | 5.30  | 7.05  |       |       |       | 5.64  |       |      |
| H6/H8                            | 8.08    | 8.27 | 7.32  | 8.23  | 8.24  | 7.2   | 7.44  | 7.66  | 7.56  |      |
| CH <sub>3</sub>                  |         |      |       |       |       | 1.33  | 1.57  |       | 1.75  |      |
| NH                               |         |      |       |       |       | 13.83 | 13.92 |       | 14.09 |      |
| NH <sub>2</sub> (1) <sup>b</sup> |         |      | 6.48  | 7.32- |       |       |       | 7.06  |       |      |
| NH <sub>2</sub> (2) <sup>b</sup> |         |      | 8.14  | 7.55  |       |       |       | 8.31  |       |      |

<sup>a</sup> uncertainty  $\pm 0.005$  ppm. <sup>b</sup> NH<sub>2</sub>(1) and NH<sub>2</sub>(2) denote non-hydrogen and hydrogen-bonded amino protons.

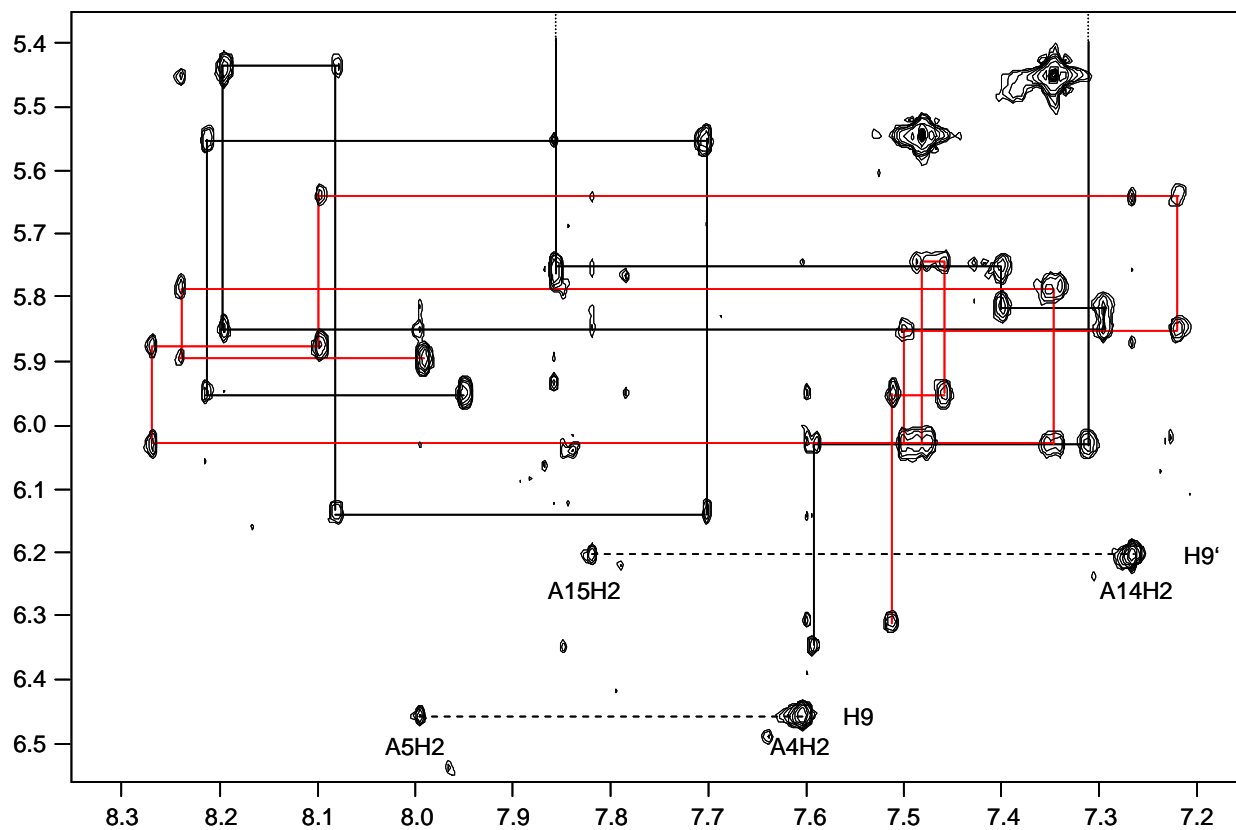

**Fig. S2** Portion of a 2D NOE spectrum of the **A4-1** bis-adduct acquired at 293 K in D<sub>2</sub>O (120 ms mixing time). Intranucleotide and sequential 2D NOE contacts between H6/H8 and H1' protons along the "G"- (black lines) and "C"-strand (red lines) are indicated together with crosspeaks between PBD H9/H9' protons and adenine H2 protons.

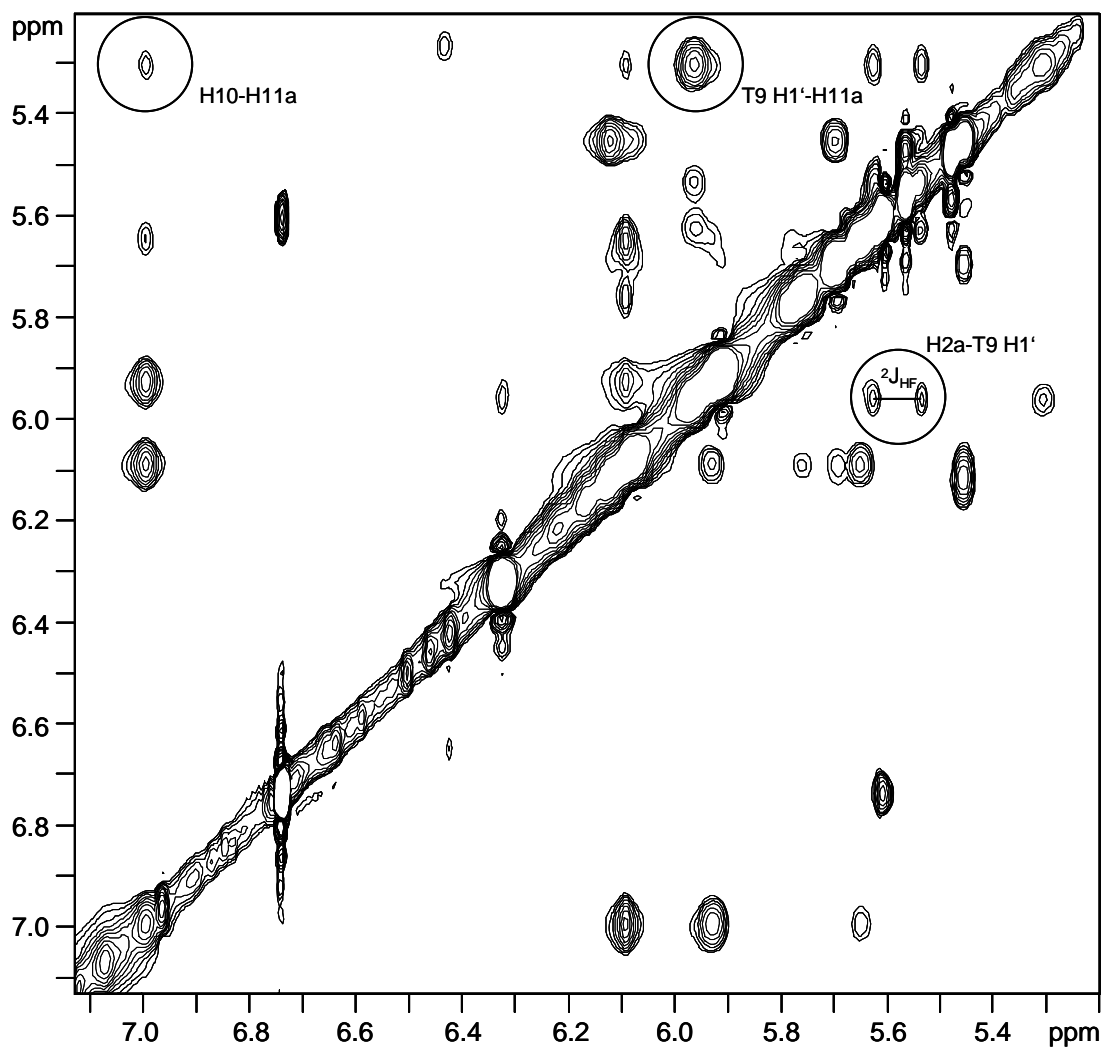

**Fig. S3** Portion of a 2D NOE spectrum of the **S4-1** adduct acquired at 283 K in 90% H<sub>2</sub>O/10% D<sub>2</sub>O (200 ms mixing time) with NOE contacts of PBD H10, H1 1a and H2a protons encircled.

**Table S3** Proton chemical shifts  $\delta$ (ppm) of d(AACAATTGTT)<sub>2</sub> (**S4**) in the complex with **1** at 283 K<sup>a</sup>

| proton                           | residue |       |      |       |       |       |       |       |       |      |
|----------------------------------|---------|-------|------|-------|-------|-------|-------|-------|-------|------|
|                                  | A1      | A2    | C3   | A4    | A5    | T6    | T7    | G8    | T9    | T10  |
| H1'                              | 5.91    | 5.69  | 6.07 | 5.92  | 5.64  | 5.77  | 5.76  | 4.91  | 5.96  | 6.32 |
| H2'                              | 2.35    | 2.58  | 2.04 | 2.69  | 2.23  | 2.23  | 2.27  | 2.03  | 2.21  | 2.31 |
| H2''                             | 2.58    | 2.72  | 2.58 | 2.86  | 2.64  | 2.23  | 2.58  | 2.73  | 2.31  | 2.31 |
| H3'                              | 4.84    | 4.94  | 4.9  | 4.98  | 4.76  | 4.91  | 4.92  | 4.92  | 4.92  | 4.56 |
| H2/H5                            |         | 7.84  | 5.45 | 7.19  | 7.87  |       |       |       |       |      |
| H6/H8                            | 8.00    | 8.23  | 7.36 | 8.30  | 8.13  | 7.19  | 7.35  | 7.82  | 7.32  | 7.56 |
| CH <sub>3</sub>                  |         |       |      |       |       | 1.32  | 1.52  |       | 1.67  | 1.74 |
| NH                               |         |       |      |       |       | 14.10 | 14.09 | 12.48 | 13.45 |      |
| NH <sub>2</sub> (1) <sup>b</sup> |         | 6.36- | 6.10 | 6.36- | 6.36- |       |       |       |       |      |
| NH <sub>2</sub> (2) <sup>b</sup> |         | 6.84  | 7.71 | 6.84  | 6.84  |       |       | 8.38  |       |      |

<sup>a</sup> uncertainty  $\pm 0.005$  ppm. <sup>b</sup> NH<sub>2</sub>(1) and NH<sub>2</sub>(2) denote non-hydrogen and hydrogen-bonded amino protons.

Proton chemical shifts  $\delta$ (ppm) of **1** in the complex with d(AACAATTGTT)<sub>2</sub> (**S4**) at 283 K<sup>a</sup>

| H1a  | H1b  | H2a  | H3a | H3b  | H6   | H9   | H10  | H11  | H11a | H12  |
|------|------|------|-----|------|------|------|------|------|------|------|
| 2.88 | 2.93 | 5.58 | --  | 4.07 | 7.17 | 6.09 | 7.00 | 4.91 | 5.30 | 3.97 |

<sup>a</sup> uncertainty  $\pm 0.005$  ppm

**Table S4** Proton chemical shifts  $\delta$  (ppm) of d(AAGAATTGTT)·d(AACAATTCTT) (**A4**) in the complex with **1** at 293 K<sup>a</sup>

| proton                             | residue |      |       |      |      |       |       |       |       |      |
|------------------------------------|---------|------|-------|------|------|-------|-------|-------|-------|------|
|                                    | A1      | A2   | G3    | A4   | A5   | T6    | T7    | G8    | T9    | T10  |
| H1'                                | 5.95    | 5.56 | 6.13  | 5.43 | 5.85 | 5.81  | 5.75  | 4.95  | 6.03  | 6.35 |
| H2'                                | 2.48    | 2.76 | 2.50  | 2.63 | 2.36 | 2.29  | 2.36  | 2.09  | 2.27  | 2.36 |
| H2''                               | 2.69    | 2.76 | 2.94  | 2.67 | 2.78 | 2.36  | 2.63  | 2.75  | 2.36  | 2.36 |
| H3'                                | 4.90    | 5.04 | 5.07  | 4.96 | 4.85 | 4.98  | 4.94  |       |       |      |
| H2/H5                              |         |      |       | 7.60 | 8.00 |       |       |       |       |      |
| H6/H8                              | 7.95    | 8.21 | 7.70  | 8.08 | 8.20 | 7.30  | 7.40  | 7.86  | 7.31  | 7.60 |
| CH <sub>3</sub>                    |         |      |       |      |      | 1.50  | 1.62  |       | 1.72  | 1.81 |
| NH <sup>b</sup>                    |         |      | 12.97 |      |      | 13.98 | 14.22 | 12.55 | 13.46 |      |
| NH <sub>2</sub> (1) <sup>b,c</sup> |         |      |       |      |      |       |       |       |       |      |
| NH <sub>2</sub> (2) <sup>b,c</sup> |         |      | 9.35  |      |      |       |       | 8.34  |       |      |
| proton                             | A11     | A12  | C13   | A14  | A15  | T16   | T17   | C18   | T19   | T20  |
| H1'                                | 5.89    | 5.78 | 6.03  | 5.87 | 5.64 | 5.85  | 6.03  | 5.74  | 5.95  | 6.31 |
| H2'                                | 2.33    | 2.61 | 2.01  | 2.69 | 2.22 | 2.18  |       |       |       |      |
| H2''                               | 2.53    | 2.76 | 2.59  | 2.87 | 2.59 | 2.18  |       |       |       |      |
| H3'                                |         |      | 4.91  | 5.01 |      |       |       |       |       |      |
| H2/H5                              |         |      | 5.45  | 7.27 | 7.82 |       |       | 5.54  |       |      |
| H6/H8                              | 7.99    | 8.24 | 7.35  | 8.27 | 8.10 | 7.22  | 7.50  | 7.48  | 7.46  | 7.51 |
| CH <sub>3</sub>                    |         |      |       |      |      | 1.38  | 1.70  |       | 1.81  | 1.75 |
| NH <sup>b</sup>                    |         |      |       |      |      | 13.98 | 13.75 |       | 14.38 |      |
| NH <sub>2</sub> (1) <sup>b,c</sup> |         |      | 6.13  |      |      |       |       | 6.68  |       |      |
| NH <sub>2</sub> (2) <sup>b,c</sup> |         |      | 7.81  |      |      |       |       | 8.05  |       |      |

<sup>a</sup> Uncertainty  $\pm 0.005$  ppm. <sup>b</sup> At 283 K in 90% H<sub>2</sub>O/10% D<sub>2</sub>O. <sup>c</sup> NH<sub>2</sub>(1) and NH<sub>2</sub>(2) denote non-hydrogen and hydrogen-bonded amino protons.

Proton chemical shifts  $\delta$  (ppm) of **1** in the complex with d(AAGAATTGTT)·d(AACAATTCTT) (**A4**) at 293 K<sup>a</sup>

|                   | PBD proton in GER-1 |     |      |      |      |                 |      |                  |      |      |                  |
|-------------------|---------------------|-----|------|------|------|-----------------|------|------------------|------|------|------------------|
|                   | H1a                 | H1b | H2a  | H3a  | H3b  | H6 <sup>b</sup> | H9   | H10 <sup>c</sup> | H11  | H11a | H12 <sup>b</sup> |
| PBD<br>G3 adduct  | 2.61                |     | 5.55 | 3.95 | 4.05 | 7.12            | 6.45 | 6.57             | 6.00 | 3.88 | 3.98             |
| PBD'<br>G8-adduct | 2.51                |     | 5.60 | 3.98 | 4.09 | 7.23            | 6.20 | 6.77             | 4.91 | 5.34 | 4.01             |

<sup>a</sup> Uncertainty  $\pm 0.005$  ppm. <sup>b</sup> no unequivocal assignment to G3- or G8-adduct. <sup>c</sup> In 90% H<sub>2</sub>O/10% D<sub>2</sub>O at 283 K.
